# Supplementary material
Source: HighWire-hosted journal article supplement (https://www.jrheum.org/highwire/filestream/38050/field_highwire_adjunct_files/0/190468DataSuppl.pdf)
Supplement: 190468DataSuppl.pdf [file 190468DataSuppl.pdf]

**Supplementary Table 1.** Results of the association analyses by generalized linear models, only including the T1 to T3 observations.

| Sample              | Variable                | Coefficient (95%CI)        | P-value |
|---------------------|-------------------------|----------------------------|---------|
| <b>Whole</b>        | <b>Time</b>             | -0.0017 (-0.001 to -0.003) | <0.001  |
|                     | <b>Type of crystals</b> |                            |         |
|                     | CPP                     | Ref.                       | -       |
|                     | MSU                     | 0.0804 (0.145 to 0.016)    | 0.015   |
|                     | <b>Temperature</b>      |                            |         |
|                     | Room                    | Ref.                       | -       |
|                     | Refrigerated            | 0.0522 (-0.011 to 0.115)   | 0.106   |
|                     | <b>Preserving agent</b> |                            |         |
|                     | EDTA                    | Ref.                       | -       |
|                     | Heparin                 | 0.0316 (-0.032 to 0.095)   | 0.326   |
| <b>MSU crystals</b> | <b>Time</b>             | 0.0010 (-0.001 to 0.003)   | 0.170   |
|                     | <b>Temperature</b>      |                            |         |
|                     | Room                    | Ref.                       | -       |
|                     | Refrigerated            | 0.0536 (-0.127 to 0.237)   | 0.260   |
|                     | <b>Preserving agent</b> |                            |         |
|                     | EDTA                    | Ref.                       | -       |
|                     | Heparin                 | 0.0731 (-0.022 to 0.168)   | 0.119   |
| <b>CPP crystals</b> | <b>Time</b>             | -0.0035 (-0.002 to -0.005) | <0.001  |
|                     | <b>Temperature</b>      |                            |         |
|                     | Room                    | Ref.                       | -       |
|                     | Refrigerated            | 0.2287 (0.592 to 0.831)    | <0.001  |
|                     | <b>Preserving agent</b> |                            |         |
|                     | EDTA                    | Ref.                       | -       |
|                     | Heparin                 | -0.1135 (-0.254 to 0.027)  | 0.112   |
|                     | <b>Time*temperature</b> | -0.0028 (-0.005 to -0.001) | 0.005   |
|                     | <b>Time*preserving</b>  | 0.0013 (-0.001 to 0.003)   | 0.187   |

95%CI: 95% confidence interval, EDTA = ethylenediaminetetraacetic acid, CPP = calcium pyrophosphate, MSU = monosodium urate.
